# Supplementary material for: Identification of Bioactive Compounds and Antioxidant Activity in Leaves and Fruits of Actinidia Arguta Accessions From Northeastern China
Source: Preprints.org preprint supplement (doi:10.20944/preprints202012.0453.v1), 2020-12-18
Supplement: Supplementary file 1 [file supplementary]

**Supplementary Materials**


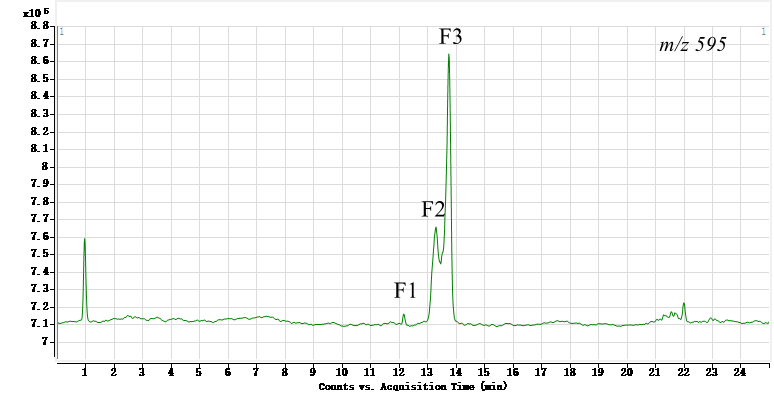

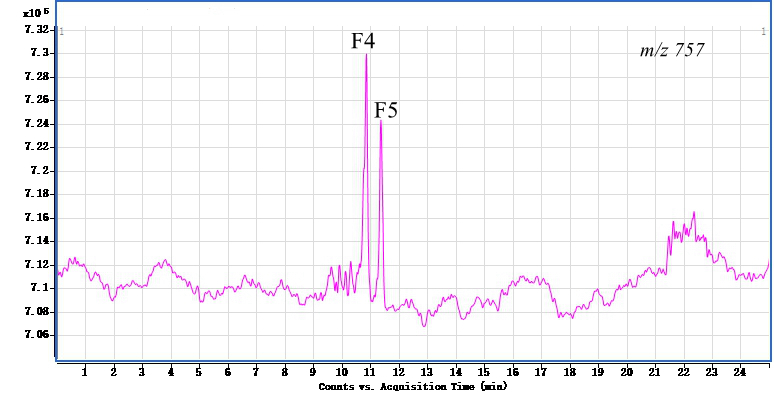

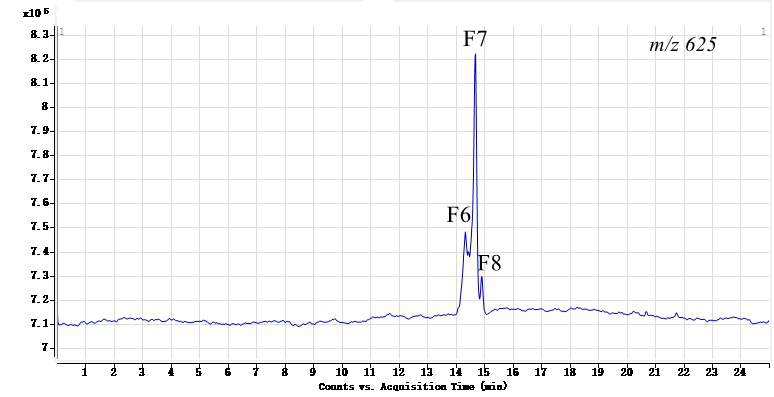

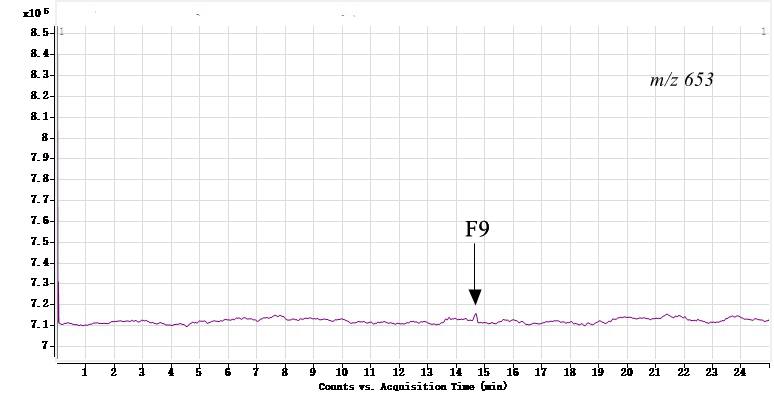

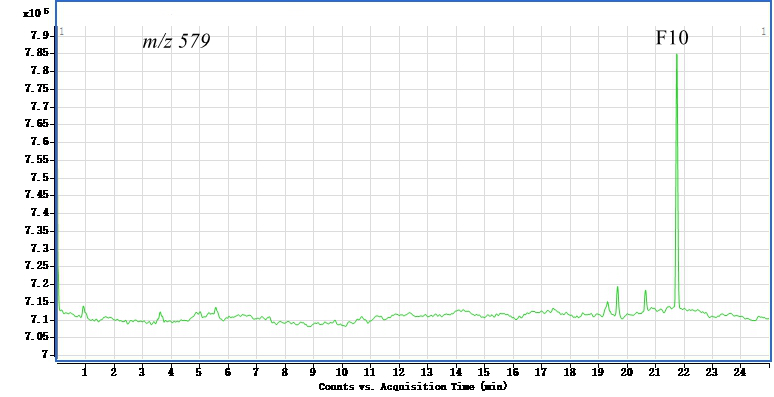


**Figure S1**. LC-MS analysis of the crude extract from leaves of *Actinidia arguta* in positive ion mode. Selected ion chromatograms of m/z 595,757,625,653,579 respectively, with the retention time of corresponding constitutions


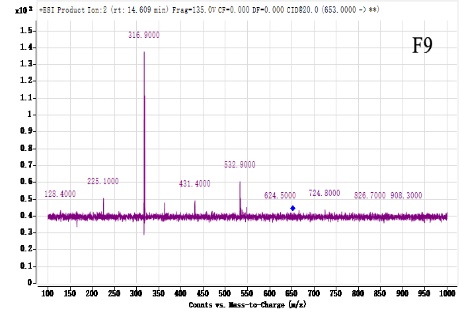

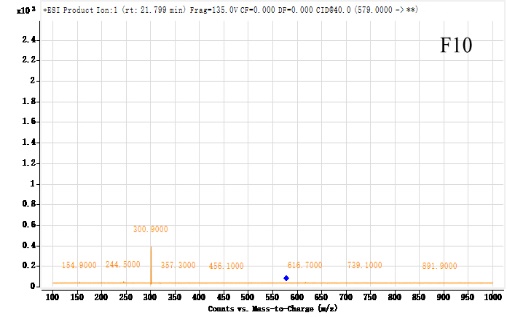


**Figure S2.** LC-MS2 spectra of [M+H]+ ion for the ten constituents


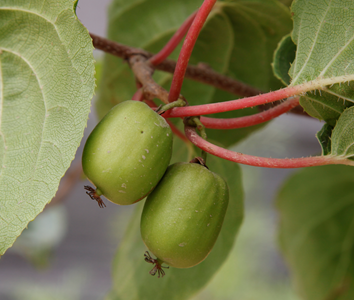

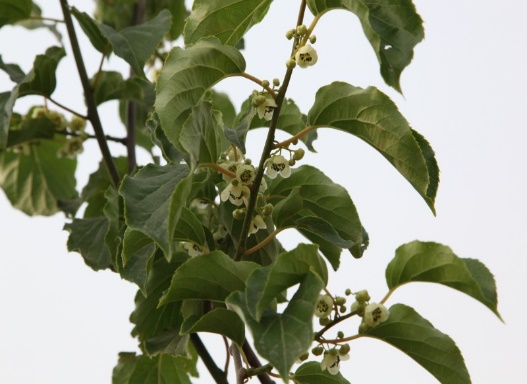

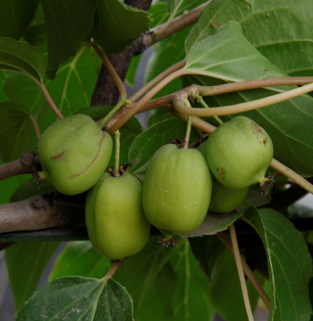

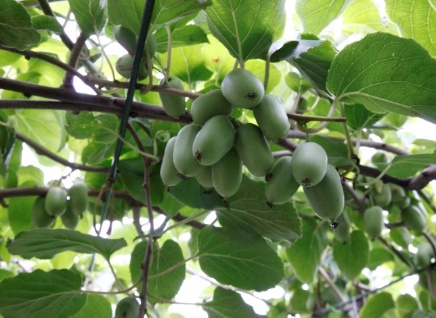


b


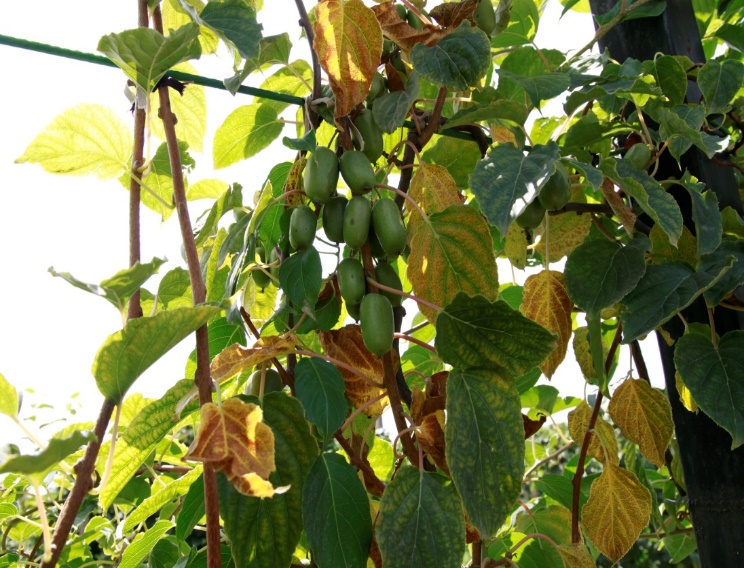


c


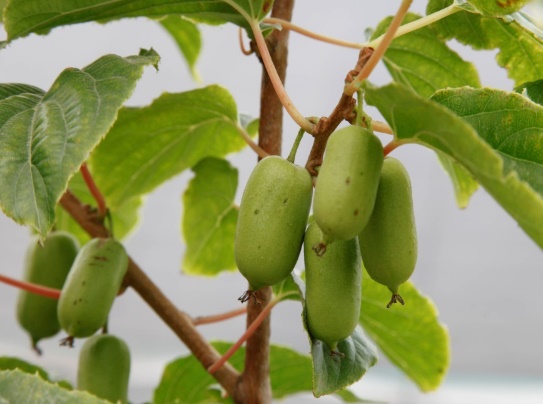


d

e


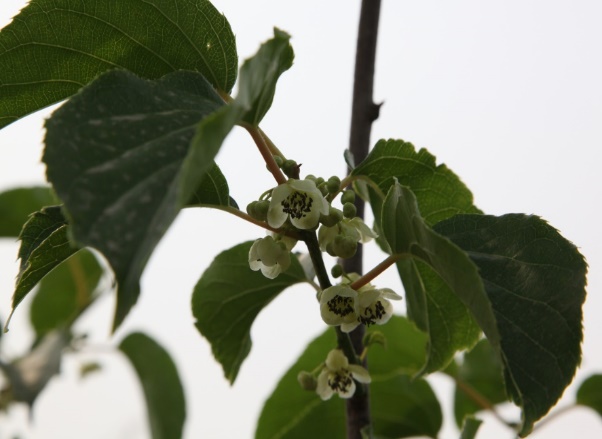


f

a


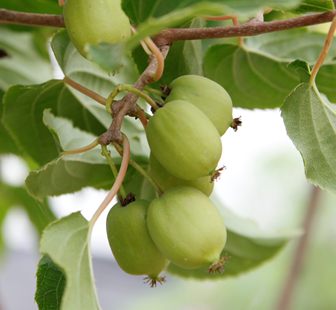


g

h

**Figure S3.** Fruits (female) or flowers (male) of eight accessions in *Actinidia arguta.* a; CJ-1; b: HY*-*1; c: CBS-3; d: CBS-11; e: CBS-6; f: CBS-8; g: BYS-13; h: BYS-5.
